1                   **Resolving Filament Level Mechanics in Collagen Networks using Activity**  
2                                           **Microscopy**

3  
4  
5                   Emanuel N. Lissek<sup>1</sup>, Tobias F. Bartsch<sup>2</sup> & Ernst-Ludwig Florin<sup>1,\*</sup>  
6

7                   <sup>1</sup> Center for Nonlinear Dynamics, Physics Department, The University of Texas at Austin,  
8                   2515 Speedway, Austin, Texas 78712, USA.

9  
10                   <sup>2</sup> Howard Hughes Medical Institute and Laboratory of Sensory Neuroscience, The  
11                   Rockefeller University, 1230 York Avenue, New York, New York 10065, USA.

12  
13                   **Abstract**

14                   Collagen is the most abundant protein in humans and the primary component of the  
15                   extracellular matrix, a meshwork of biopolymer networks, which provides structure and  
16                   integrity to tissues. Its mechanical properties profoundly influence the fate of cells. The  
17                   cell-matrix interaction, however, is not well understood due to a lack of experimental  
18                   techniques to study the mechanical interplay between cells and their local environment.  
19                   Here we introduce Activity Microscopy, a new way to visualize local network mechanics  
20                   with single filament resolution. Using collagen I networks *in vitro*, we localize fibril  
21                   positions in two-dimensional slices through the network with nanometer precision and  
22                   quantify the fibrils' transverse thermal fluctuations with megahertz bandwidth. Using a  
23                   fibril's thermal fluctuations as an indicator for its tension, we find a heterogeneous stress  
24                   distribution, where “cold” fibrils with small thermal fluctuations surround regions of highly  
25                   fluctuating “hot” fibrils. We seed HeLa cells into collagen networks and quantify the  
26                   anisotropy in the propagation of their forces.

27

## 28 **Introduction**

29 Filamentous biopolymer networks fulfill a plethora of mechanical functions both inside  
30 and outside of cells. Intracellular networks impart motility and mechanical strength to  
31 cells<sup>1</sup>, while the networks of the extracellular matrix (ECM) provide integrity to tissues  
32 and entire organs<sup>2</sup>. A particular biopolymer network can fulfill many distinct functions,  
33 often achieved by the same basic building blocks arranged in different architectures. For  
34 example, collagen, the most prominent component of the extracellular matrix, can be  
35 arranged into networks of fibers with wildly diverse densities and connectedness, from the  
36 loose and soft elastic networks that form the interstitial matrix of the skin to densely packed  
37 mineralized fibers in bones<sup>3</sup>. Many physiological processes are regulated by the stiffness  
38 of the ECM, such as cellular migration, differentiation or proliferation<sup>4-6</sup>. The stiffness also  
39 plays a role in the progression of skin cancer, as cancerous cells remodel the collagen  
40 network of the extracellular matrix to reach blood vessels<sup>7</sup>.

41

42 Filamentous biopolymer networks are used by engineers as scaffolds to build artificial  
43 tissues that mimic true physiological mechanical properties. However, such approaches  
44 remain challenging without a better understanding of the complex interplay between  
45 individual filament properties, network architecture and mechanical function<sup>8,9</sup>. Since the  
46 typical pore size of these networks is on the same order as the size of cells embedded in  
47 the network, cells interact mainly with the individual filaments that surround them, rather  
48 than with the global network. To migrate through the extracellular matrix, for example,  
49 cells must either squeeze through pores in the network or remodel fibers. Systematic  
50 progress in understanding such local cell-matrix interaction is hindered by a lack of  
51 techniques that can simultaneously resolve the local network architecture and the  
52 interaction forces between cells and filaments.

53

54 Currently, the three-dimensional architecture of networks and their interaction with cells  
55 can be resolved by confocal microscopy, either in fluorescence or reflection mode, or by  
56 light sheet microscopy<sup>10</sup>. These imaging modes do not, however, directly measure the  
57 mechanics of the interaction. Forces generated by cells can be indirectly quantified from  
58 network deformation data by traction-force microscopy (TFM), provided that the

59 mechanical properties of the filaments and their connectedness are known. Recently,  
60 Steinwachs *et al.*<sup>11</sup> computed for the first time<sup>12</sup> the forces that breast carcinoma cells apply  
61 to biopolymer networks designed to mimic the cells' physiological surroundings. Forces  
62 were calculated from network deformations around the cell using a finite-element approach  
63 based on a constitutive equation that captures the complexity of the surrounding network.  
64 A drawback of this method is that the measurement of network deformations requires  
65 knowledge of the force free state, which is achieved by disassembling the force generating  
66 filamentous actin network within the cells. The method then assumes that all deformations  
67 are elastic, which neglects plastic deformations that have been observed to occur in the  
68 ECM<sup>13,14</sup>. There currently exists no method capable of continuously quantifying cell-  
69 matrix interactions with single filament resolution and without the assumption of elastic  
70 deformations.

71

72 Here we introduce Activity Microscopy, a method for measuring the precise location and  
73 the lateral thermal fluctuations of filaments in fibrous biopolymer networks with  
74 subnanometer precision and megahertz bandwidth. The magnitude of the lateral  
75 fluctuations is a function of filament tension, bending stiffness, network architecture, and,  
76 possibly, fluctuating active forces. Therefore, lateral fluctuations are a direct measure for  
77 cell-matrix interactions. For an *in vitro* collagen I network, we localize fibrils with  
78 nanometer precision and measure their fluctuations along their contour. We find that  
79 tension bearing fibrils with small fluctuations surround pockets of weakly loaded fibrils  
80 with larger fluctuations. To demonstrate the sensitivity of Activity Microscopy to changes  
81 in fibril stiffness, we observe the reduction of fibril fluctuations after cross-linking with  
82 glutaraldehyde. Finally, we seed collagen matrices with HeLa cells and measure the  
83 reduction in magnitude and the increase in asymmetry of fluctuations near cells.

## 84 Results

85

### 86 Principle of Activity Microscopy

87 Activity microscopy aims to visualize the contribution of every filament to a network's  
88 macroscopic mechanical response while simultaneously providing precise information  
89 about the network architecture. The filament bending stiffness, stretching and compression  
90 forces, and network connectivity affect transverse filament fluctuations, which can either  
91 be thermally driven or caused by active elements in the network. We recently demonstrated  
92 that thermally driven filament fluctuations can be quantified even in “athermal” collagen I  
93 networks<sup>15</sup> for which transverse fluctuations are not expected to contribute to the  
94 mechanical response<sup>16</sup>. Here, we develop this method further and introduce two-  
95 dimensional Activity Microscopy. We image areas that include many pore diameters and  
96 thus provide insight into how individual filaments contribute to the network's overall  
97 mechanical response.

98 For Activity Microscopy imaging, a near infrared laser beam is focused into a sample  
99 chamber filled with a filament network. The forward scattered and unscattered laser light  
100 is then collected and guided onto a quadrant photo diode (QPD) (**Fig. 1a**). This detection  
101 scheme is commonly used in optical trapping experiments<sup>17,18</sup>. The QPD outputs two  
102 signals, which are calculated from the voltage differences between the quadrants,  $S_x =$   
103  $(S_I + S_{III}) - (S_{II} + S_{IV})$  and  $S_y = (S_I + S_{II}) - (S_{III} + S_{IV})$  (**Fig. 1a,b**). In optical  
104 trapping experiments,  $S_x$  and  $S_y$  can be directly related to the  $x$ - and  $y$ -position of a  
105 trapped particle. However, in the case of filaments, the signals are not independent but  
106 depend on the orientation of the filament relative to the QPD (**Supplementary Fig. 1**).

107 For two-dimensional imaging, a plane of interest is selected (**Fig. 1c**) and raster scanned  
108 by translating the sample in steps (**Fig. 1d**), which are chosen to be smaller than the  
109 diffraction limited spot diameter. **Figure 1e** and **f** show the average detector signals, the  
110 calculated detector sensitivities and the raw noise signal for the example of an *in vitro*  
111 collagen I network. A total area of  $7 \mu\text{m} \times 7 \mu\text{m}$  was scanned with a step width of  
112  $100 \text{ nm}$ . At each point, a time series of  $100 \text{ ms}$  was recorded at  $100 \text{ kS s}^{-1}$ . The left panel  
113 in **Figure 1e** shows the averaged detector signal  $\bar{S}_x$  along the  $x$ -axis from which the  
114 detector sensitivities  $\partial\bar{S}_x/\partial x$  and  $\partial\bar{S}_x/\partial y$  (mid panels) are calculated. Clearly,  $S_x$  is

115 mainly sensitive to fibrils that are oriented vertically. The highest sensitivity is measured  
 116 when the laser beam is centered on the fibril (broad vertical line). This is expected from  
 117 the detector response to a fibril, which has its maximal slope at the midpoint of the fibril  
 118 (**Supplementary Fig. 1**). Thus, the location of maximal sensitivity can in turn be used to  
 119 determine the precise position of the fibril axis. The fibril's transverse position fluctuations  
 120 can be calculated from the standard deviation s.d. of the times series of  $S_x$  and  $S_y$ . Since  
 121 the highest detector sensitivity leads to the largest raw position noise for a given filament  
 122 fluctuation amplitude, the maxima in the raw noise image (right panel) also indicate the  
 123 positions along the fibril axis.

124

125 **Figure 1**

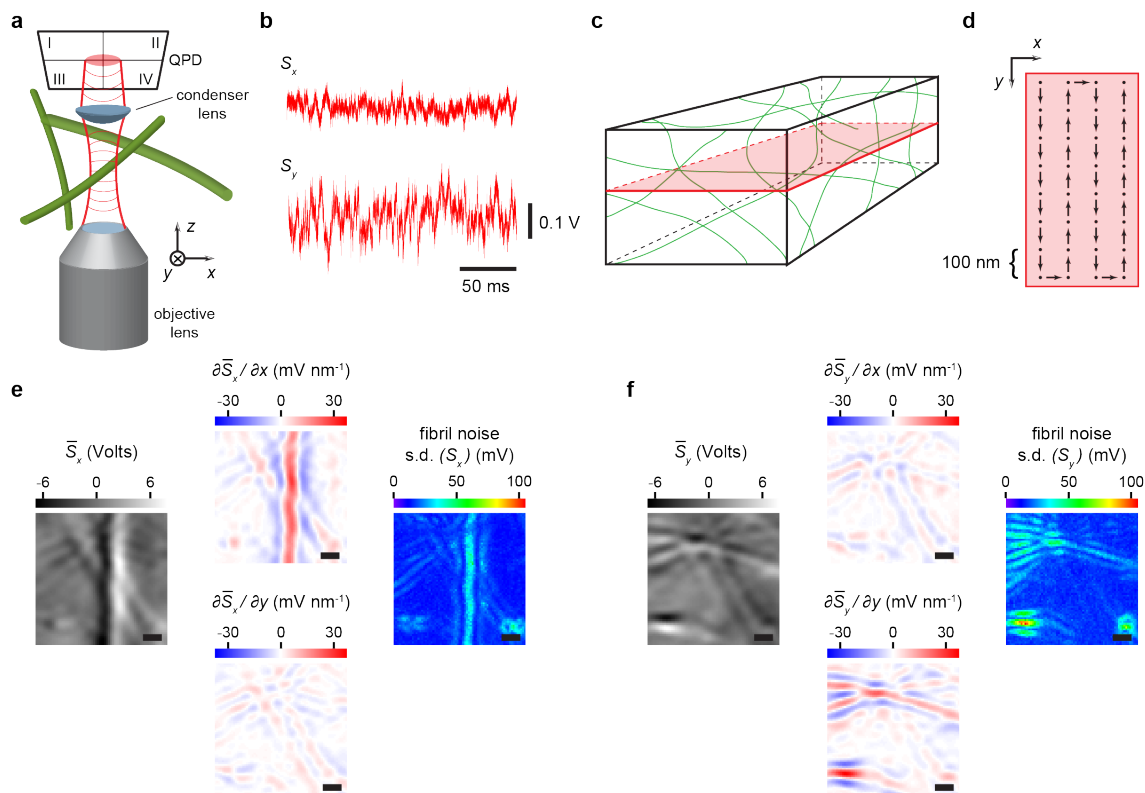

**Activity Microscopy.** (a) A near infrared laser beam is focused into the sample filled with a collagen I *in vitro* network (green: fibrils). The forward scattered light from a fibril is collected by a condenser lens and guided onto a quadrant-photo diode (QPD) where it interferes with the unscattered portion of the laser beam. A time series of lateral voltage signals  $S_x = (S_I + S_{III}) - (S_{II} + S_{IV})$  and  $S_y = (S_I + S_{II}) - (S_{III} + S_{IV})$ , recorded at one position are shown in b. (c, d) For imaging, a plane of interest in the sample is selected and

scanned line by line while recording time series at each position (black dots). The mean detector signal  $\bar{S}_x$  is shown in the left panel of **e**. To find the fibrils' axes, the spatial derivatives  $\partial\bar{S}_x/\partial x$  and  $\partial\bar{S}_x/\partial y$  are calculated, termed detector sensitivity (middle panel). The raw transverse fibril noise is calculated from the time series of  $S_x$  and displayed as the standard deviation (s.d.) (right panel). **f** shows the averaged detector signal, derivatives and transverse fibril noise for the  $y$ -signal, which has its maximal sensitivity for fibrils oriented along the horizontal axis. Scale bars in **e** and **f** are  $1\ \mu\text{m}$ . The collagen network was polymerized according to protocol I (see Methods). Distance between scanning lines and dots in **d** is  $100\ \text{nm}$ . Time series at each location in **e** and **f** is  $100\ \text{ms}$  long.

126

127 The fibril noise images in **Figure 1e** and **f** show “ghost filaments” that run next to the main  
128 fibril axis. They result from the characteristic detector response of a fibril. Besides the  
129 maximal detector sensitivity when the fibril is directly in focus, the detector also has  
130 significant sensitivities to the left and right of the center (**Supplementary Fig. 1c**, dashed  
131 lines). These regions of the detector response with negative slope are clearly visible in the  
132 detector sensitivity panels as blue lines, i.e. negative sensitivities, that follow the fibril on  
133 either side. Since negative sensitivities can be easily identified, this detection artifact can  
134 be corrected for by removing signals originating from locations in the sample with negative  
135 sensitivities (**Supplementary Fig. 2**).

136

### 137 **Finding Filament Axes and Orientations**

138 Point-by-point Activity Microscopy imaging is time consuming because at each point in  
139 the region of interest a time series must be recorded for a sufficiently long time to  
140 characterize the local fluctuations of the filaments. Given an approximate pore size of  
141  $2 - 3\ \mu\text{m}$  for the collagen concentration used here ( $2.4\ \text{mg}\ \text{ml}^{-1}$ ) (ref. 19), most of the  
142 scanning time is spent inside pores. Additionally, fibril fluctuation amplitudes can only  
143 change along the contour of a filament, but not transversally to the contour. Thus, data  
144 from the same position along the contour of the filament, but at different positions  
145 transversal to its axis, yield the same fluctuation amplitude as long as the filament remains  
146 within the linear range of the detector (**Supplementary Fig. 3**). For characterizing the  
147 fluctuation of each fibril in the network, it is therefore sufficient to measure fibril  
148 fluctuations only at points along the fibril axis. To implement such an imaging algorithm,

149 the locations and orientations of all fibrils in a network must be known. We achieve this  
 150 by rapidly pre-scanning the network (“fast scan”), only recording time series sufficiently  
 151 long to determine the average detector signals  $\bar{S}_x$  and  $\bar{S}_y$ .

152

153 **Figure 2**

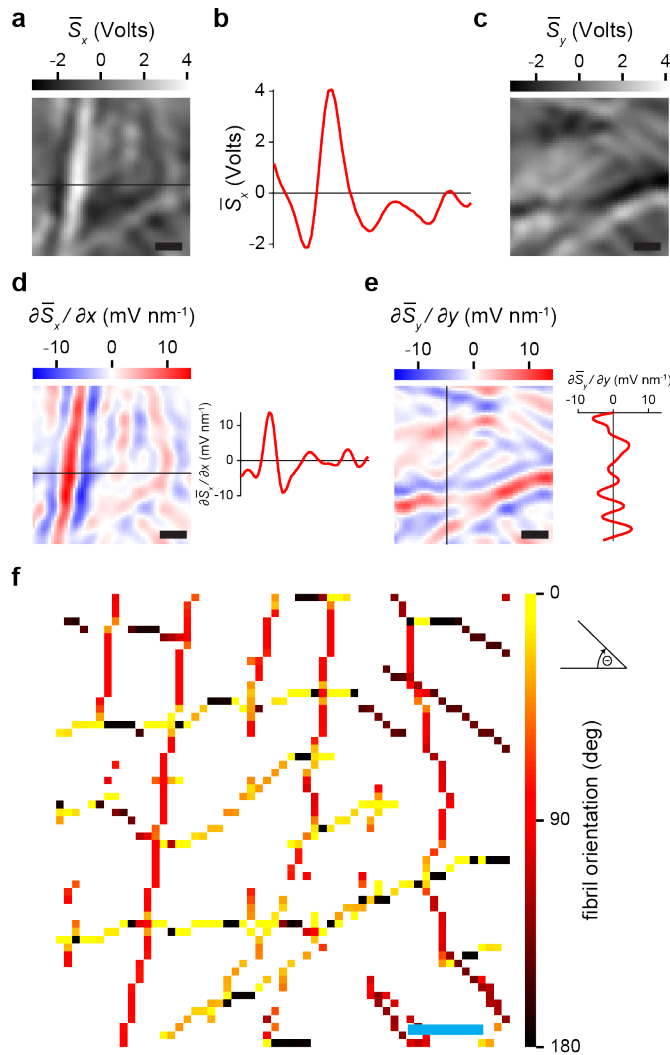

**Localization of fibrils.** Fibrils are located using the maximum sensitivity values either along the  $x$  - or  $y$  - direction depending on their orientation relative to the detector coordinate axes. A line profile of the mean signal  $\bar{S}_x$  (black line in **a**) reveals the detector response to an individual fibril (**b**). (**c**) The mean signal  $\bar{S}_y$  from the same scan as in **a**. The detector sensitivities  $\partial\bar{S}_x/\partial x$  (**d**) and  $\partial\bar{S}_y/\partial y$  (**e**) show maxima at the fibrils' locations (see also representative horizontal and vertical line profiles, respectively).  $\partial\bar{S}_x/\partial x$  is used to identify fibrils oriented with an angle  $\leq 45^\circ$  w.r.t. the vertical direction, while  $\partial\bar{S}_y/\partial y$  serves to find fibrils oriented with an angle  $< 45^\circ$  w.r.t. the horizontal direction. The locations of the fibrils are plotted in **f**. The color indicates the fibril orientation w.r.t. the horizontal direction (see Methods). Scale bars are  $1 \mu m$ . The collagen network was polymerized according to protocol I (see Methods).

154

155 **Figure 2a** and **c** show the results for a time series with a length of  $5 ms$  (**Supplementary**  
 156 **Note 1**). There is no obvious degradation in the  $\bar{S}_x$  and  $\bar{S}_y$  images in comparison to the  
 157 images shown in **Figure 1e** and **f**. The line profiles of the average detector signals are still

158 smooth (**Fig. 2b**) and the calculated detector sensitivities are essentially noise free (**Fig.**  
159 **2d,e**). Since the positions of maximal detector sensitivities colocalize with the fibrils'  
160 locations, we can use these images to localize the fibrils. To achieve this, horizontal and  
161 vertical line profiles of the  $\bar{S}_x$  and  $\bar{S}_y$  signals, respectively, are extracted and the locations  
162 of the maxima determined. In this way, the fibrils' axes are found with nanometer precision  
163 (**Supplementary Note 1**). **Figure 2f** shows the locations of the fibrils identified using this  
164 algorithm on a grid with a pixel size of  $100\text{ nm} \times 100\text{ nm}$ . Ghost filaments are excluded  
165 because they correspond to minima in the detector sensitivity. The orientation of filaments  
166 relative to the detector orientation is then determined (see Methods) and displayed color-  
167 coded for each filament position. This algorithm reliably finds fibril axes locations and  
168 orientation in a  $5\text{ }\mu\text{m} \times 5\text{ }\mu\text{m}$  image in approximately two minutes.

169

### 170 **Long-range imaging**

171 For visualizing how individual filaments contribute to the overall mechanical response of  
172 a network, it is necessary to image areas that are large relative to the pore diameter. This is  
173 challenging because slow drift of the sample or instrument will lead to increasing  
174 discrepancies between the fibril's positions found by fast scanning, and the locations at  
175 which the fluctuations are recorded. To solve this problem, we subdivide the area of interest  
176 into smaller tiles of  $5\text{ }\mu\text{m} \times 5\text{ }\mu\text{m}$  and perform Activity Microscopy imaging tile by tile,  
177 thus avoiding significant relative drifts. As shown in **Figure 3a**, fibrils can be traced this  
178 way over long distances without discontinuities. In each tile, a sequence of four steps is  
179 performed. The fast scan with dwell time of  $5\text{ ms}$  per pixel is recorded and the fibrils' axes  
180 and their orientations are determined (**Fig. 3b**). The list of fibril positions is then used to  
181 record fluctuation data for  $200\text{ ms}$  only directly on the fibrils' axes. To obtain an accurate  
182 detector calibration at the time that fluctuation data are recorded, the detector sensitivity is  
183 measured at each pixel of interest by scanning the fibril perpendicularly to its axis through  
184 the laser beam (**Fig. 3c,d**). The scan is used to calibrate the raw voltage signals which then  
185 provide an accurate measure for the transverse fibril fluctuation at a given position on the  
186 filament axis (**Fig. 3e,f**). At every position we chose either the  $x$ - or  $y$ -channel, depending  
187 on which one has the greater sensitivity. Both channels will pick up the same fluctuation  
188 amplitude except for fibrils that are perfectly aligned with one of the detector axes. This



189 selection of channels minimizes the uncertainty in fluctuation measurements  
190 (Supplementary Fig. 4).

191 **Figure 3f** shows a  $30\ \mu\text{m} \times 30\ \mu\text{m}$  Activity Microscopy large scale image of a collagen  
192 network, in which the amplitude of the transverse filament fluctuations is color-coded for  
193 the range  $0 - 20\ \text{nm}$ . The distribution of fluctuation amplitudes in the network is  
194 heterogeneous: a few fibrils with strongly suppressed fluctuations cross the entire network  
195 and in-between are pockets of strongly fluctuating fibrils.

196

197 **Figure 3**

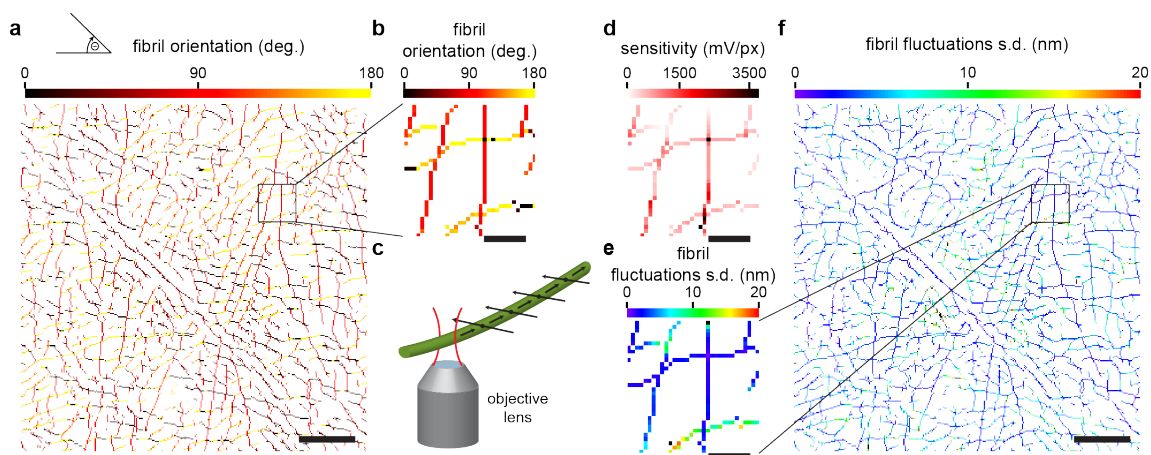

198

**Quantitative imaging of fibril fluctuations.** The map of fibril locations and orientations (a, b) are used to record fibril fluctuations only at selected points corresponding to fibrils' axes. In a first step, the detector signal is recalibrated by scanning the laser beam perpendicularly to a fibril axis (c). d shows the refined detector sensitivities for each fibril position. A 200 ms time series is then recorded, and the raw voltage signals are converted into calibrated transverse fibril fluctuations using the measured detector sensitivity. e and f show the final Activity Microscopy image. Each fibril position is shown color-coded with the magnitude of its transverse fluctuation. Scale bars are  $5\ \mu\text{m}$  in a and f,  $1\ \mu\text{m}$  in b, d, and e. The collagen network was polymerized according to protocol I (see Methods).

199

200 **Pore size distribution**

201 Activity Microscopy images of collagen networks suggest a heterogeneous distribution of  
202 fibril fluctuations. A few fibrils with strongly suppressed fluctuations divide the field of  
203 view, while the regions between them are filled with fibrils with large fluctuations. To

204 quantify this observation, we calculate the average pore size distribution for “hot” (strongly  
205 fluctuating) and “cold” (weakly fluctuating) fibrils.  
206 To calculate the pore size distribution, we adapted a robust method for calculating pore  
207 sizes from confocal images of collagen networks developed by Mickel *et al.*<sup>19</sup>, which does  
208 not rely on specific assumptions or network models. Fibrils are represented by medial axes  
209 instead of their diffraction limited image. In our case, fibrils are represented by one-pixel  
210 wide lines corresponding to a width of 100 nm. For each pixel of the fluid phase, the radius  
211 of the largest disk that can be fitted into the pore while still including the pixel, is  
212 determined. For pixels within the center of a pore, the maximal disk size is given by the  
213 contact of the disk with the medial axes that form the pore. Pixels confined by fibrils in  
214 corners will have a smaller radius. The pore size distribution for a network can be  
215 summarized by a histogram of radii for all pixels of the fluid phase. The goal in our case is  
216 to show that cold and hot filaments have different pore sizes. To achieve this, we divide all  
217 fibrils (**Fig. 4a**) into an equal number of cold (blue) and hot (red) filaments based on the  
218 cumulative probability of fibril fluctuations (**Fig. 4b**). An equal number of cold and hot  
219 fibrils is achieved at a fluctuation threshold of  $\sim 5$  nm. A binary image representing the  
220 cold and hot fibrils shows again the large-scale pattern of cold filaments surrounding  
221 pockets of hot filaments (**Fig. 4c**). To visualize the pore size distribution within an Activity  
222 Microscopy image, we plot the maximal pore size, color-coded for every pixel in the fluid  
223 phase either for all (**Fig. 4d**), only hot (**Fig. 4e**), or only cold fibrils (**Fig. 4f**). The overall  
224 characteristics of the three cases is summarized in the probability density distribution of  
225 pore radii (**Fig. 4g**). Except for a few pores, the pore radius for most pores is narrowly  
226 distributed around 435 nm. Hot filaments alone have a slightly higher peak pore radius of  
227 567 nm (**Supplementary Note 2**). In contrast, cold filaments have clearly a much larger  
228 average pore radius indicated by the change in color and size of pores (**Fig. 4f**) and the  
229 distribution of pore radii with a peak of 897 nm (**Fig. 4g**). This confirms quantitatively the  
230 observation that cold filaments divide the network into pockets of hot filaments. Assuming  
231 that cold filaments are a result of tension along their axes, one could interpret the data as a  
232 few filaments carrying tension over long distances, while leaving pockets of relatively low-  
233 tension fibrils between them. To our knowledge, such a heterogeneous stress distribution  
234 has never been experimentally shown before.

235 **Figure 4**

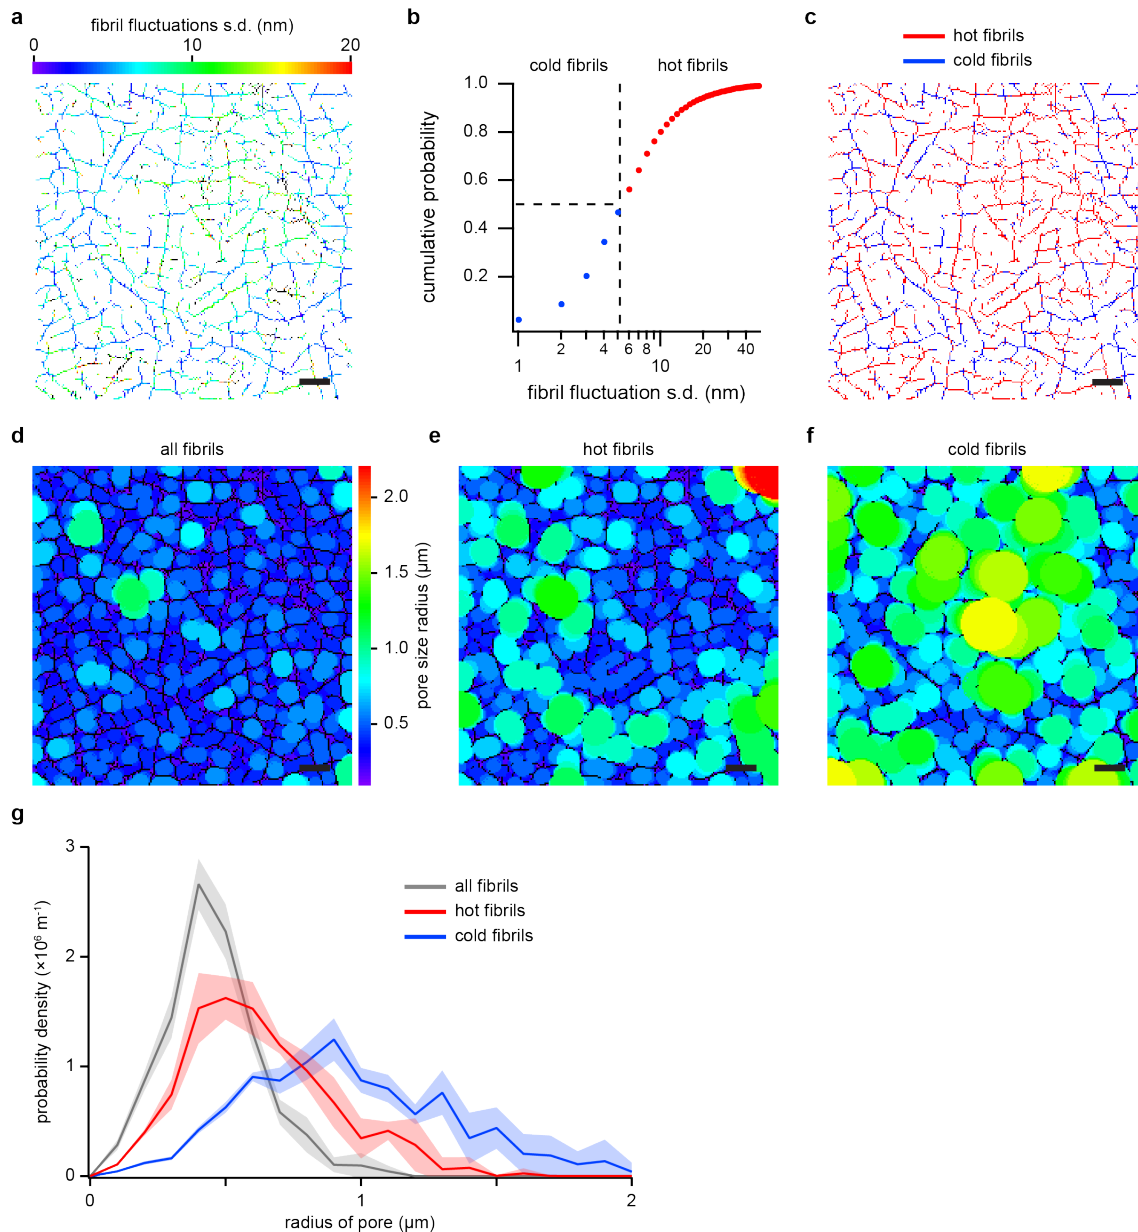

**Pore size distribution for strongly fluctuating (hot) versus weakly fluctuating (cold) fibrils.** (a) Activity Microscopy image ( $20 \mu\text{m} \times 20 \mu\text{m}$ ) of a network of native *in vitro* collagen I fibrils. The cumulative probability of fibril fluctuations for the image shown in a is used to divide fibrils equally into hot (red) and cold (blue) (b). The dashed lines indicate the median used to split the fibrils into hot and cold as also displayed in c. This image is used to calculate pore sizes between the network's fibrils (d) using a method described by Mickel *et al.*<sup>19</sup> (see Methods). The subset of hot fibrils forms smaller pores than the subset of cold fibrils (e, f). (g) The difference in pore sizes of networks of hot and cold fibrils can

be quantified by the probability densities of their pore size radii. Cold fibrils form pores  $\approx 1.6 \times$  the size of the pores formed by hot fibrils (shaded region represents s.d. of four independent Activity Microscopy images of two different samples). Scale bars are  $2 \mu\text{m}$ . Collagen was polymerized according to protocol II (see Methods).

236

### 237 **Collagen crosslinking**

238 To demonstrate that Activity Microscopy imaging is sensitive to changes in the mechanics  
239 of collagen fibrils, we investigated networks crosslinked with glutaraldehyde, a molecular  
240 crosslinking agent commonly used for cell and tissue fixation. Glutaraldehyde crosslinks  
241 collagen fibrils internally by coupling individual collagen molecules and connecting the  
242 constituent proteins' surface lysines. It does not, however, change aspects of the network's  
243 structure, such as fiber width and length, or pore size<sup>20</sup>. Therefore, mainly a change in the  
244 stiffness of the fibrils and a corresponding reduction in transverse fluctuations are expected.

245 **Figure 5a** and **c** show  $30 \mu\text{m} \times 30 \mu\text{m}$  Activity Microscopy images of a native collagen  
246 network and a crosslinked network, respectively. Both networks were prepared in the same  
247 way except for the added crosslinking step (see Methods). The suppression of transverse  
248 fibril fluctuation through internal crosslinking of fibrils is immediately visible as a color  
249 shift corresponding to smaller fluctuations. To quantify the change in fibril fluctuations,  
250 we calculated the probability density distribution from the fluctuation amplitude for all  
251 fibrils shown in the Activity Microscopy images. **Figure 5b** shows such a distribution for  
252 the native network. The distribution is asymmetric with a maximum around  $3 - 4 \text{ nm}$  and  
253 a long tail up to  $20 \text{ nm}$ . After crosslinking, the distribution shows a strong shift towards  
254 smaller amplitudes with a maximum around  $1 \text{ nm}$  and a long tail up to  $10 \text{ nm}$  (**Fig. 5d**).  
255 These data demonstrate the sensitivity of Activity Microscopy to subtle changes in filament  
256 mechanics.

257

258

259 **Figure 5**

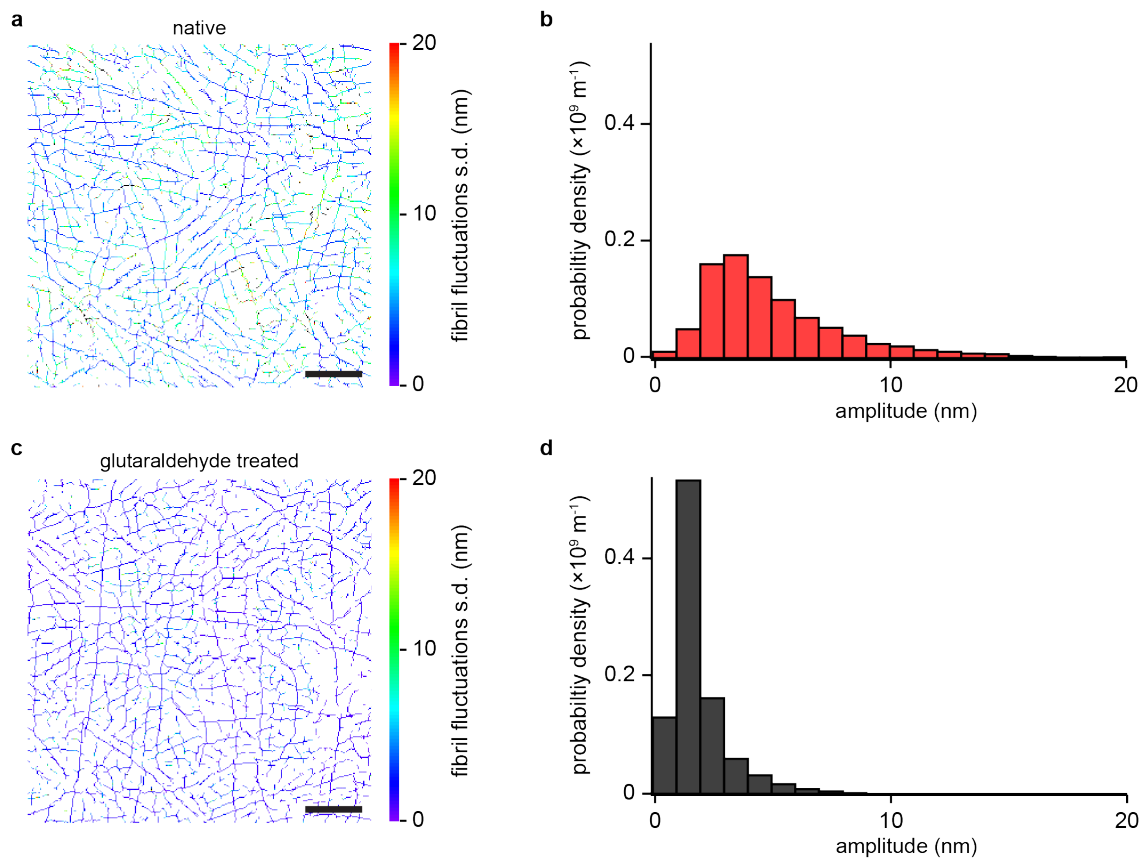

**Reduction in collagen fibril fluctuations due to chemical crosslinking.** (a) Activity Microscopy image of an *in vitro* network of native collagen I fibrils. (b) Probability density of fibril fluctuation amplitudes computed from all pixels shown in a. The peak of the distribution is located at  $4.7 \pm 0.7 \text{ nm}$  (s.d. of five independent Activity Microscopy images of two different samples). (c) Activity Microscopy image of a collagen I network cross-linked with 4 % glutaraldehyde. (d) Probability density for the crosslinked network in c. Crosslinking leads to a reduction in fluctuation amplitudes with a new peak location around  $1.6 \pm 0.4 \text{ nm}$  (s.d. of 4 independent Activity Microscopy images of 2 different samples). The bin width in b and d is 1 nm. Scale bars are 5  $\mu\text{m}$ . The collagen networks were polymerized according to protocol I (see Methods).

260

261 **HeLa cells in a collagen I network: active forces**

262 Cells growing and migrating in collagen matrices apply forces to individual fibrils that  
263 result in network deformations and remodeling<sup>4</sup>. To demonstrate that Activity Microscopy  
264 is able to quantify and visualize these changes, we seeded HeLa cells into collagen I

265 matrices and measured fibril fluctuations at varying distance from the cells. HeLa cells are  
266 known to proliferate but not migrate in collagen<sup>21,22</sup>, yet actively apply forces to the  
267 network. We expect fluctuations of fibrils under tension to be reduced, and the tension to  
268 fall off with the distance from the cell. **Figure 6a** shows the probability densities of  
269 fluctuations amplitudes measured in  $10\ \mu\text{m} \times 10\ \mu\text{m}$  areas next to (black),  $50\ \mu\text{m}$  (blue)  
270 and  $100\ \mu\text{m}$  (red) away from a cell. While there is no significant difference between the  
271 distributions measured close to the cell (peak at  $3.8\ \text{nm}$ ) and  $50\ \mu\text{m}$  away (peak at  
272  $3.9\ \text{nm}$ ), the distribution shifts towards larger amplitudes at  $100\ \mu\text{m}$  away (peak at  
273  $4.9\ \text{nm}$ ). Each measurement took  $\approx 30\ \text{min}$  to complete which is sufficiently long to  
274 expect changes in the cell's state. We therefore recorded another distribution next to the  
275 cell (yellow). In contrast to the first recording, fluctuations are now strongly suppressed  
276 with a peak amplitude of  $2.6\ \text{nm}$  and a corresponding overall contraction of the  
277 distribution to smaller amplitudes. To confirm our observation, we repeated the  
278 experiments several times and increased the scan area to  $20\ \mu\text{m} \times 20\ \mu\text{m}$  to increase the  
279 quality of the probability density distribution. For reference, we measured the distribution  
280 for cell free matrices prepared under the same conditions. The average of all measurements  
281 for matrices with cells (red) and without cells (black) are shown in **Figure 6b**. The  
282 reduction in fluctuation amplitude relative to the cell free matrices confirms that the cells  
283 apply tension to the network. This tension seems to fall off within  $100\ \mu\text{m}$  as the  
284 distribution measured  $100\ \mu\text{m}$  away from the cell approaches the average distribution  
285 measured in cell free matrices. Anisotropy in tension is an additional signature expected  
286 for cells applying tension to the surrounding matrix. Cells pulling on the fibrils in their  
287 surroundings will deform the network. Fibrils radiating out will carry away and distribute  
288 the tension while concentric fibrils will experience reduced tension. To show this  
289 anisotropy, we analyzed the fluctuation amplitude dependent on their orientation to the  
290 detector coordinate axes. **Figure 6c** shows a polar graph for fluctuations recorded around  
291 a point  $20\ \mu\text{m}$  away from a cell. Fibrils radiating away from the cell show an  $\approx 37\ \%$   
292 reduction in fluctuation amplitude relative to fibrils oriented in perpendicular direction.  
293 The orientation of the ellipse agrees with the location of the cell relative to the scan area  
294 (inset). This can be independently confirmed by light microscopy imaging which allows  
295 us to determine the position of the cell relative to the scanned area. As a control, we applied

296 the same analysis algorithm to data recorded on cell free collagen networks. In this case,  
 297 as expected, fluctuation amplitudes are distributed isotropically (**Fig. 6d**).

298 In summary, these data demonstrate that the sensitivity range of Activity Microscopy  
 299 imaging is well within the range of changes caused by cells to the matrix.

300

301 **Figure 6**

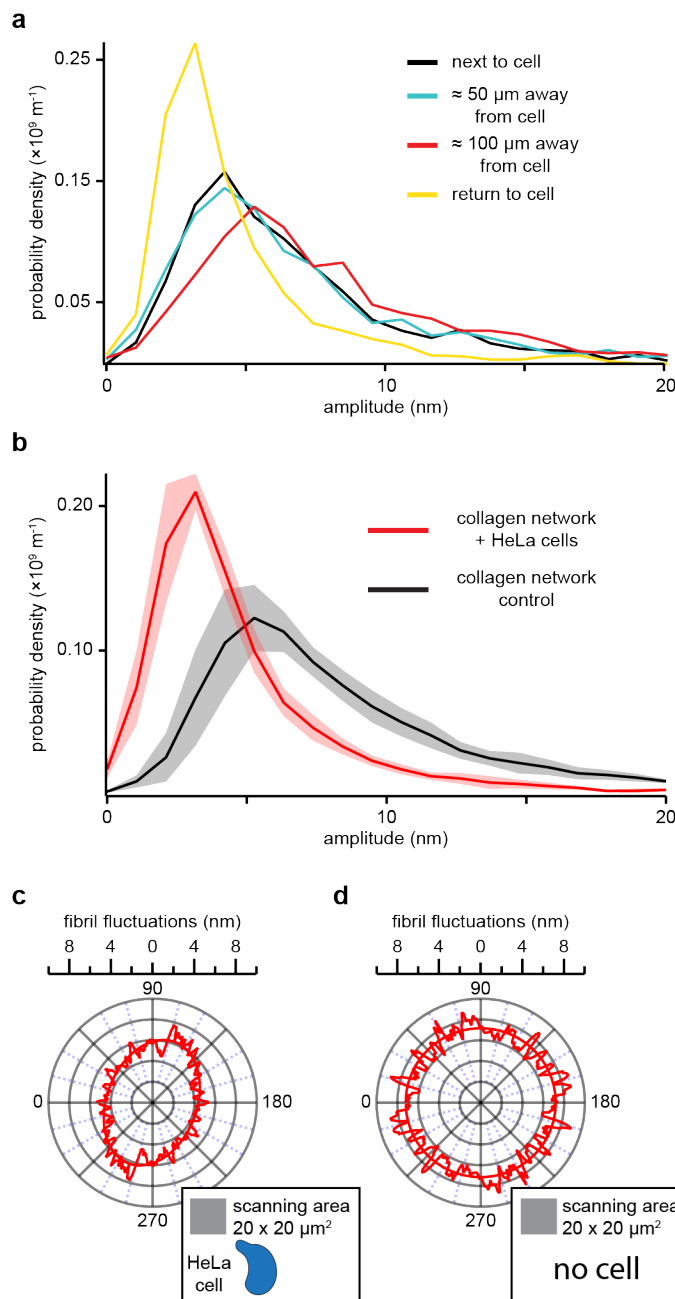

**Collagen I network response to embedded HeLa cells. (a)**

Probability density distributions of fibril fluctuation amplitudes at varying distances from a HeLa cell in an *in vitro* collagen I network. Each distribution was computed from a  $10 \mu\text{m} \times 10 \mu\text{m}$  Activity

Microscopy image. Each scan took  $\approx 30 \text{ min}$  to complete. (b) Average probability density distribution (red) calculated from four different  $20 \mu\text{m} \times 20 \mu\text{m}$  scans next to HeLa

cells ( $< 5 \mu\text{m}$ ). The shaded region indicates the s.d. For reference, an average probability distribution (black) calculated from four scans in a cell free network is shown. The presence of cells shifts the distribution towards smaller

fluctuations, from  $5.1 \text{ nm}$  for cell free networks to  $2.7 \text{ nm}$  for networks with embedded HeLa cells. Fibrils analyzed for **b** can be sorted by their angle relative to the detector coordinate axes and the dependence

of their fluctuations on this angle can be displayed in a polar graph (c). The fluctuation

of their fluctuations on this angle can be displayed in a polar graph (c). The fluctuation

amplitudes reveal that radially oriented fibrils (w.r.t. the cell) display  $\approx 37\%$  weaker fluctuations on average than tangentially oriented fibrils (see inset). No significant anisotropy is observed in cell free networks (**d**). Here, the data from one representative cell free network from **b** were used. All probability densities distributions have a bin width of  $1\text{ nm}$ . The polar graphs show smoothed raw data (sliding box count = 4) and an elliptical fit. The collagen networks were polymerized according to protocol II (see Methods).



## 303 Discussion

304 Networks made of stiff biopolymers such as collagen I are usually modeled as  
305 athermal<sup>14,23,24</sup>, i.e. the thermal undulations of their constituent filaments are assumed to  
306 play no significant role in their mechanical response. Here, we showed that thermally  
307 driven transverse filament fluctuations can nevertheless be measured, despite their  
308 ångström to nanometer amplitudes. Finding the location of fibrils previous to fluctuation  
309 measurements allowed us to reduce two-dimensional imaging to effective one-dimensional  
310 fluctuation measurements along a fibril's contour. In this way, we were able to probe large  
311 areas of a network that include many pores, thus bridging the gap between single filament  
312 and overall network behavior. The observation of different pore sizes for cold and hot  
313 fibrils is one prominent result of this new ability. Further, we calculated probability density  
314 distributions of filament fluctuations representing the state of a network and its changes.  
315 We demonstrated that these changes can originate from increased stiffness of the individual  
316 fibrils in case of crosslinking or from tension applied to the fibrils in case of cells. Thus,  
317 Activity Microscopy imaging covers the relevant range of fluctuation amplitudes to  
318 characterize networks and their interaction with embedded HeLa cells. In both cases, the  
319 thickness of the sample ranged from 0.5 – 1.0 *mm*, sufficiently large to treat the matrix as  
320 a three-dimensional network.

321  
322 Recently, Steinwachs *et al.*<sup>11</sup> estimated the total force applied by a breast cancer cell to a  
323 collagen matrix to be on the order of 50 *nN*. As the pore size of the network is small  
324 relative to the cell's volume, the total force is expected to be distributed over many fibrils,  
325 with a maximum force per fibril in the nanonewton range or smaller. To estimate whether  
326 transverse fibril fluctuations are still within the range of Activity Microscopy, we  
327 calculated the transverse filament fluctuations based on a theory of semiflexible filaments  
328 under tension for fibril lengths of 10 – 40  $\mu\text{m}$  and forces up to 10 *nN* (refs. 16,25)  
329 (**Supplementary Fig. 5, Supplementary Note 3**). Assuming a detection limit of 1 *nm*, all  
330 fluctuation amplitudes are within the range of Activity Microscopy. Only for the shortest  
331 collagen fibrils of length 10  $\mu\text{m}$  and an applied tension of 10 *nN*, the detection threshold  
332 of 1 *nm* is reached. Very small forces do not significantly change the fluctuation  
333 amplitudes (see plateaus in **Supplementary Fig. 5**). The minimal detectable tension

334 depends on the fibril length. For example, for collagen fibrils of length  $10\ \mu\text{m}$ , only  
335 tensions larger than  $100\ \text{pN}$  significantly change fluctuations amplitudes. For  $40\ \mu\text{m}$   
336 fibrils, this threshold is much lower, around tens of piconewtons. These estimates show  
337 that Activity Microscopy covers the relevant force range for studying cell-matrix  
338 interaction also for cells that are expected to show strong interactions with the surrounding  
339 matrix, such as migrating cancer cells<sup>26</sup>.

340

341 Imaging speed is another factor required to follow cell-matrix interaction of motile cells.  
342 For our study, we chose HeLa cells that are known to interact with collagen matrix, but are  
343 unable to migrate<sup>21,22</sup>, leaving sufficient time to image the selected areas of the network  
344 around them. Migrating cancer cells, however, move with speeds on the order of  
345 micrometers per minute<sup>27</sup>, a time scale on which one would like to monitor their interaction  
346 with all fibrils of the matrix. This poses a challenge for Activity Microscopy that can be  
347 met with current technology. Pre-scans of volumes around a cell, required for finding all  
348 fibrils in a network, can be sped up to less than a minute by using a fast scanning mode of  
349 the scanning stage instead of the step by step scanning mode used in this work. This will  
350 reduce the precision in localizing the fibrils, but as we pointed out above, the precise  
351 knowledge of fibril position is not required for the measurement of fibril fluctuations as  
352 long as the fibril remains in the linear range of the detector (**Supplementary Fig. 3**). The  
353 characteristic length scale of the network is set by the pore size. The imaging speed can  
354 therefore be increased by measuring a fibril's fluctuations only at single points spaced by  
355 the network pore size. Assuming a pore diameter of  $2.5\ \mu\text{m}$  (ref. 19), this will reduce the  
356 time required to measure fibril fluctuations by a factor of 25, compared to our current  
357 stepsize of  $100\ \text{nm}$ . These two improvements in imaging speed might be sufficient for  
358 studying the interaction between motile cells and their surrounding matrix.

359

360 Activity Microscopy also has broad applications in materials research, where networks are  
361 static and hence much easier to image. Collagen networks are extremely stable and  
362 therefore large volumes can be imaged. We expect to gain new insight into how single  
363 filament mechanics and network architecture lead to macroscopic mechanical properties.  
364 This allows for a systematic study of network preparation conditions and a rational design

365 of networks with desired properties. The response to point and shear forces and other  
366 network manipulations such as enzymatic activity or chemical treatment by cross-linkers  
367 can also be studied.  
368

## 369 **Materials and Methods**

370

### 371 **High Bandwidth, High Precision Position Detection**

372 Measurements were performed on a custom-built photonic force microscope (PFM) as  
373 described in detail by Bartsch *et al.*<sup>15,28</sup>. In brief, the beam of a 1064 nm laser (Mephisto,  
374 500 mW, Coherent, CA, USA) was expanded and focused through a water immersion  
375 objective lens (UPlanSApo, 60 × W, Olympus, Tokyo, Japan) into the sample. The sample  
376 chamber was mounted on a three-dimensional nano-positioning stage (Nano-  
377 View/M375HS, Mad City Labs, WI, USA), which allowed for the sample to be moved  
378 relative to the stationary optical trap. Forward scattered light from a collagen fibril, together  
379 with unscattered light of the laser beam was collected by a condenser lens and projected  
380 onto a quadrant photodiode (G6849, Hamamatsu Corporation, NJ, USA), where the two  
381 waves interfered. The differential signal from the QPD were amplified by custom-built low  
382 noise differential amplifiers (SA500, Oeffner MSR, Plankstadt, Germany). This detection  
383 scheme has a megahertz electronic bandwidth.

384

### 385 **In vitro Collagen I Networks – Polymerization Protocol I**

386 Collagen networks were prepared and polymerized *in vitro* as described in Bartsch *et al.*<sup>15</sup>.  
387 In brief, acid-soluble rat-tail tendon collagen (Collagen I, rat tail, 354236, Corning®, NY,  
388 USA) and bovine-dermis collagen (Collagen I, bovine, 354231, Corning®, NY, USA) were  
389 mixed at relative concentrations of 1:2. The mixture was then diluted to a total collagen  
390 concentration of 2.4 mg ml<sup>-1</sup> by adding equal parts of 10 × DMEM (D2429, Sigma  
391 Aldrich, MO, USA) and 0.27 M NaHCO<sub>3</sub>. To induce gel polymerization, the pH of the  
392 solution was raised to pH 10 using 1 M NaOH. All components were kept on ice during  
393 mixing. The mixture was then quickly pipetted into a preassembled sample chamber  
394 consisting of a glass coverslip attached by vacuum grease to a metal sample chamber  
395 (**Supplementary Fig. 7**) and left to polymerize for ~ 1 h at 37° C in a humidity-controlled  
396 incubator with 5% CO<sub>2</sub> atmosphere. Polymerizing the network inside the sample chamber  
397 ensures its attachment to the coverslip, which is a prerequisite for a mechanically stable  
398 assay. Networks were between 500 μm and 1 mm thick. After polymerization, the gel was

399 gently rinsed with 1 ml of 1 × Phosphate-buffered saline (PBS). Care was taken to never  
400 let the network dry out.

401 After polymerization of the collagen network, the sample chamber was closed by  
402 attachment of a top coverslip (**Supplementary Fig. 7**) and the chamber was filled with  
403 1 × PBS before being completely sealed off with vacuum grease.

404

#### 405 **Collagen Network Crosslinking**

406 After polymerization of the collagen network as described above, approximately 100 µl of  
407 4 % *v/v* glutaraldehyde (GA) in deionized water, was pipetted on top of the collagen and  
408 the sample was placed back into the incubator for ~ 2 h. After incubation, the collagen was  
409 thoroughly rinsed with 1 × PBS and the sample chamber was assembled and mounted on  
410 the PFM.

411

#### 412 **Cell Culture**

413 HeLa cells were kindly gifted to us by Prof. Aaron Baker (Biomedical Engineering  
414 Department, The University of Texas at Austin). HeLa cells were adapted to and cultured  
415 in CO<sub>2</sub> independent medium (Gibco™, 18045088), which allows for cell culture under  
416 atmospheric conditions. The medium was supplemented with 10 % bovine calf serum  
417 (GE, HyClone, SH30072), 4 mM L-glutamine, 100 IU ml<sup>-1</sup> penicillin and 100 µg ml<sup>-1</sup>  
418 streptomycin at 37° C. Cells were passaged every three days. To detach cells from the  
419 culture flask, the disassociation agent TrypLE™ Express Enzyme 1 × (ThermoFisher  
420 Scientific, 12605036) was used.

421

#### 422 **Cell Seeding in Collagen Matrix – Polymerization Protocol II**

423 To produce collagen networks with seeded HeLa cells, the collagen network protocol as  
424 described above had to be altered in order to incorporate the cell culture medium with a  
425 buffer system independent of CO<sub>2</sub> control as the sample is subject to atmospheric  
426 conditions while mounted on the PFM. Similarly to the above, acid-soluble rat-tail tendon  
427 collagen (Collagen I, rat tail, 354236, Corning®, NY, USA) and bovine-dermis collagen  
428 (Collagen I, bovine, 354231, Corning®, NY, USA) were mixed at relative concentrations  
429 of 1:2 on ice. The mixture was then diluted with 10 % (*vol/vol*) 10 × PBS and the pH

430 neutralized to  $\text{pH} = 7.2 - 7.4$  with  $1 \text{ M}$  NaOH and kept on ice. HeLa cells in culture at  
431  $80 - 90 \%$  confluency were detached from the culture flask using the disassociation agent  
432 TrypLE™ Express Enzyme  $1 \times$  (ThermoFisher Scientific, 12605036) and spun down at  
433  $125 \times g$  for  $10 \text{ min}$ . The cells were then resuspended in serum-free  $\text{CO}_2$  independent  
434 medium (Gibco™, 18045088) and supplemented with  $4 \text{ mM}$  L-glutamine at a  
435 concentration between  $(40 - 80) \times 10^4 \text{ cells ml}^{-1}$ . Finally, the medium containing the  
436 cells was added to the neutralized collagen solution on ice at a relative concentration of  
437  $20 \%$  (*vol/vol*) to yield a final cell concentration between  $(7 - 15) \times 10^4 \text{ cells ml}^{-1}$ ,  
438 and collagen concentration of  $2.4 \text{ mg ml}^{-1}$ . The solution was carefully mixed, pipetted  
439 into the preassembled sample chamber and placed in a humidity controlled  $37^\circ \text{ C}$  incubator  
440 for  $1 \text{ h}$ . The network was then topped with  $\sim 100 \mu\text{l}$  of serum-free  $\text{CO}_2$  independent cell  
441 media and allowed to incubate overnight.

442

#### 443 **Calculating the angle of fibril axis**

444 Having determined all locations belonging to the fibril axis, we assign an orientation angle  
445 value to each individual location, termed filament location in the following. Choosing one  
446 filament location after another as the center, we sweep a full circle of given radius  $r$  (here:  
447  $r = 4 \text{ pixels}$ ) in discrete angle steps of  $\pi/100$ . For every step we calculate an alignment  
448 score corresponding to the number of filament locations that are aligned with the straight-  
449 line segment connecting  $-r$  and  $r$ . The alignment score can take a value between 0 and  $2r$   
450 pixels. We then find the angle corresponding to the maximum by Gaussian fitting, which  
451 corresponds to the local fibril angle at this location. If a filament location is not connected  
452 to any others, therefore alone standing, it is discarded.

453

#### 454 **Calculation of Collagen Fibril Fluctuation, Background Correction and Thresholding**

455 While performing Activity Microscopy measurements a small part of the signal can be  
456 attributed to background noise, which arises primarily from four different sources:  
457 electronic noise in the amplifier and stage control, laser power fluctuations, mechanical  
458 instabilities in the PFM setup, as well as background contributions by parts of the network  
459 out of focus. Those noise sources could be characterized individually, but it is simpler to  
460 estimate the sum background signal by positioning the laser focus inside of network pores

461 in a collagen sample, far away from fibrils. We determined that on average the s.d. of the  
462 background signal is  $\bar{\sigma}_{background,x} = 12.56 \pm 0.39 \text{ mV}$  and  $\bar{\sigma}_{background,y} = 12.33 \pm$   
463  $0.92 \text{ mV}$ . Assuming all signals to be independent random variables we can subtract the  
464 variance of the background signal  $\bar{\sigma}_{background,x}^2$  from the variance of the signal measured  
465 in volts  $\sigma_{S_x}^2(x, y)$  to get a fibril's true motion:

$$466 \quad u_x(x, y) = \frac{\sqrt{\sigma_{S_x}^2(x, y) - \bar{\sigma}_{background,x}^2}}{\partial \bar{S}_x / \partial x(x, y)}, \quad (3)$$

467 where  $\partial \bar{S}_x / \partial x(x, y)$  is the local detector sensitivity. An analogous expression is valid for  
468 the  $y$ -signal. In addition, we chose the smallest acceptable detector sensitivity as  
469  $20 \text{ mV pixel}^{-1}$  for pixels with side lengths of  $100 \text{ nm}$ . Any locations with local sensitivity  
470 values below our threshold were deleted. Around all measured scanning areas a two pixel-  
471 wide frame was deleted as the spatial derivative for finding fibril locations is ill defined at  
472 the edges. For larger scans that required the successive scanning of multiple subsections, a  
473  $1 \mu\text{m}$  overlap between the subsections prevented gaps in the data after deleting pixels at  
474 the edges.

475

### 476 **Pore Size Distribution for Hot versus Cold Fibrils**

477 An Activity Microscopy image displaying fibril fluctuations is first divided into equally  
478 sized sets of “hot” and “cold” fibrils by finding the median of the fluctuation amplitude  
479 distribution. We then perform a pore size analysis partially adapted from Mickel *et al.*<sup>19</sup>,  
480 on three Activity Microscopy images, albeit in two dimensions. In brief, we first convert  
481 the image into a simple binary dataset, where all pixels that belong to a fibril are assigned  
482 an arbitrarily high value, and all pixel belonging to a network pore are assigned the value  
483 zero. We then determine for every pore pixel the largest disk to fit into a given network  
484 pore without intersecting any pixels belonging to a fibril. Each pore pixel in the image is  
485 then assigned the radius of the largest disk that incorporated said pixel as its value.

486

### 487 **Data Analysis, Visualization, and Code Availability**

488 The data were acquired and analyzed using custom software written in Labview (National  
489 Instruments, TX, USA) and Igor Pro (Wavemetrics, OR, USA) and is available from the  
490 corresponding author upon request.

491

492 **Data Availability**

493 The data that support the findings of this study are available from the corresponding author  
494 upon reasonable request.

495

496 **Acknowledgments**

497 We gratefully acknowledge the support of NSF research awards DMR-1310559 and DMR-  
498 1710646. This work was partially supported by a Junior Fellow award from the Simons  
499 Foundation to T.F.B. We thank Suzanne Jacobs for kindly reading of the manuscript and  
500 providing valuable feedback.

501

502 **Author Contributions**

503 E.N.L., T.F.B., and E.-L.F. conceived the experiments. E.N.L. performed the  
504 experiments, developed analysis software and analyzed data. T.F.B. and E.N.L. wrote  
505 software to control the instrument. T.F.B. wrote the software to calculate the angle of a  
506 fibril's axis. E.N.L., T.F.B, and E.-L.F. wrote the manuscript.

507



508 **References**

- 509 1. Alberts, B. Johnson, A. Lewis, J. Raff, M. Roberts, K. Walter, P. *Molecular Biology*  
510 *of the Cell*. (Garland Science, New York, NY, 2008).
- 511 2. Fratzl, P. *Collagen Structure - Structure and Mechanics*. (Springer Science +  
512 Business Media, LLC, New York, NY, 2008).
- 513 3. Nimni, M. E. *Collagen: Biochemistry, Volume 1*. (Taylor & Francis Group, 2018).
- 514 4. Friedl, P., Zanker, K. S. & Bröcker, E.-B. Cell Migration Strategies in 3D  
515 Extracellular Matrix: Differences in Morphology, Cell Matrix Interactions and  
516 Integrin Function. *Microsc. Res. Tech.* **43**, 369–378 (1998).
- 517 5. Engler, A. J., Sen, S., Sweeney, H. L. & Discher, D. E. Matrix Elasticity Directs  
518 Stem Cell Lineage Specification. *Cell* **126**, 677–689 (2006).
- 519 6. Janmey, P. A., Winer, J. P., Murray, M. E. & Wen, Q. The hard life of soft cells.  
520 *Cell Motility and the Cytoskeleton* **66**, 597–605 (2009).
- 521 7. Egeblad, M., Rasch, M. G. & Weaver, V. M. Dynamic interplay between the  
522 collagen scaffold and tumor evolution. *Curr. Opin. Cell Biol.* **22**, 697–706 (2010).
- 523 8. Murphy, S. V. & Atala, A. 3D bioprinting of tissues and organs. *Nat. Biotechnol.*  
524 **32**, 773–785 (2014).
- 525 9. Park, K. M., Shin, Y. M., Kim, K. & Shin, H. Tissue Engineering and Regenerative  
526 Medicine 2017: A Year in Review. *Tissue Eng. Part B Rev.* **0**, ten.TEB.2018.0027  
527 (2018).
- 528 10. Chen, B.-C. *et al.* Lattice light-sheet microscopy: Imaging molecules to embryos at  
529 high spatiotemporal resolution. *Science* **346**, 1257998–1257998 (2014).
- 530 11. Steinwachs, J. *et al.* Three-dimensional Force Microscopy of Cells in Biopolymer  
531 Networks. *Nat. Methods* **13**, 171–176 (2016).
- 532 12. Wang, K., Cai, L., Lan, B. & Fredberg, J. J. Hidden in the mist no more : physical  
533 force in cell biology. *Nat. Methods* **13**, 124–125 (2016).
- 534 13. Malandrino, A., Mak, M., Kamm, R. D. & Moenendarbary, E. Complex mechanics  
535 of the heterogeneous extracellular matrix in cancer. *Extrem. Mech. Lett.* **21**, 25–34  
536 (2018).
- 537 14. Kim, J. *et al.* Stress-induced plasticity of dynamic collagen networks. *Nat.*  
538 *Commun.* **8**, (2017).

- 539 15. Bartsch, T. F., Kochanczyk, M. D., Lissek, E. N., Lange, J. R. & Florin, E.-L.  
540 Nanoscopic imaging of thick heterogeneous soft-matter structures in aqueous  
541 solution. *Nat. Commun.* **7**, 12729 (2016).
- 542 16. Broedersz, C. P. & Mackintosh, F. C. Modeling semiflexible polymer networks.  
543 *Rev. Mod. Phys.* **86**, 995–1036 (2014).
- 544 17. Allersma, M. W., Gittes, F., DeCastro, M. J., Stewart, R. J. & Schmidt, C. F. Two-  
545 dimensional tracking of ncd motility by back focal plane interferometry. *Biophys.*  
546 *J.* **74**, 1074–1085 (1998).
- 547 18. Pralle, A., Prummer, M., Florin, E.-L., Stelzer, E. H. K. & Hörber, J. K. H. Three-  
548 Dimensional High-Resolution Particle Tracking for Optical Tweezers by Forward  
549 Scattered Light. *Microsc. Res. Tech.* **44**, 378–386 (1999).
- 550 19. Mickel, W. *et al.* Robust pore size analysis of filamentous networks from three-  
551 dimensional confocal microscopy. *Biophys. J.* **95**, 6072–80 (2008).
- 552 20. Vader, D., Kabla, A., Weitz, D. & Mahadevan, L. Strain-Induced Alignment in  
553 Collagen Gels. *PLoS One* **4**, e5902 (2009).
- 554 21. Schor, S. L. Cell proliferation and migration on collagen substrata in vitro. *J. Cell*  
555 *Sci.* **41**, 159–75 (1980).
- 556 22. Elsdale, T. & Bard, J. Collagen substrata for studies on cell behavior. *J. Cell Biol.*  
557 **54**, 626–637 (1972).
- 558 23. Licup, A. J. *et al.* Stress controls the mechanics of collagen networks. **112**, (2015).
- 559 24. Licup, A. J., Sharma, A. & Mackintosh, F. C. Elastic regimes of subisostatic  
560 athermal fiber networks. *Phys. Rev. E* **93**, (2016).
- 561 25. MacKintosh, F. C., Käs, J. & Janmey, P. A. Elasticity of semiflexible biopolymer  
562 networks. *Phys. Rev. Lett.* **75**, 4425–4428 (1995).
- 563 26. Koch, T. M., Munster, S., Bonakdar, N., Butler, J. P. & Fabry, B. 3D Traction  
564 Forces in Cancer Cell Invasion Thorsten. *PLoS One* **7**, e33476 (2012).
- 565 27. Fraley, S. I. *et al.* A distinctive role for focal adhesion proteins in three-dimensional  
566 cell motility. *Nat. Cell Biol.* **12**, 598–604 (2010).
- 567 28. Bartsch, T. F. *et al.* Detecting sequential bond formation using three-dimensional  
568 thermal fluctuation analysis. *ChemPhysChem* **10**, 1541–1547 (2009).
- 569
